# Supplementary material
Source: HighWire-hosted journal article supplement (https://bmjopen.bmj.com/content/11/10/e047467)
Supplement: inline-supplementary-material-2 [file inline-supplementary-material-2.pdf]

**Supplementary table 2.** Characteristics of the interventions performed in the studies included in this scoping review.

| Authors., year                | SMI <sup>a</sup>                           | Intervention                         | Control Group (CG)/ Intervention Group (IG)                                                                                                                                                                                                                                     | Duration (w) | Sessions <sup>b</sup>                   | Measurment instruments                                                    | Intervention manager                  |
|-------------------------------|--------------------------------------------|--------------------------------------|---------------------------------------------------------------------------------------------------------------------------------------------------------------------------------------------------------------------------------------------------------------------------------|--------------|-----------------------------------------|---------------------------------------------------------------------------|---------------------------------------|
| Schindler [45], 1999          | Schizophrenia and major affective disorder | Psychosocial group intervention      | CG: No treatment (board games and free time)<br>GI1: Activity group, consisted of a project-level group (individuals working together on a shared task)<br>GI2: Structured discussion group focused on eliciting social interaction (e.g., meaningful ways to spend time alone) | 2            | Three-weekly one-hour sessions          | Halstead-Reitan, Rey Figure, PASAT, Selective Reminding Test, MSE         | OT                                    |
| Shellwood et al. [20], 1999   | Schizophrenia                              | Psychosocial individual intervention | CG: Outpatient-based rehabilitation (care as usual).<br>IG: Care as usual and home-based rehabilitation (problems of everyday living and symptom management)                                                                                                                    | 36           | Not stated                              | BPRS, MMSE, SBS, GHQ, The Lancashire Quality of Life                      | OT, psychologist, informal caregivers |
| Hadas-Lidor et al. [21], 2001 | Schizophrenia                              | Cognitive individual intervention    | CG: Traditional occupational therapy treatment individually and in groups: functional tasks and expressive activities.<br>IG: Cognitive intervention by means of instrumental enrichment program.                                                                               | 52           | Two- to three-weekly one-hour sessions  | LPAD, RCF, IADL, RPM, TCSC-2, GATB                                        | OT                                    |
| Wu et al. [46], 2001          | Schizophrenia and psychosis                | Psychosocial individual intervention | CG: Standard occupational therapy treatment<br>IG: Motivational intervention                                                                                                                                                                                                    | 12           | Two-weekly one-hour sessions            | GCOS, COTE                                                                | OT                                    |
| Wykes et al. [22], 2002       | Schizophrenia                              | Cognitive individual intervention    | CG: healthy control participants<br>IG1: Cognitive Remediation Therapy (CRT) based on cognitive flexibility, working memory and planning.<br>IG2: Control therapy involving intensive OT activities (role play, making a life diary and relaxation)                             | 12           | Three- to four-weekly one-hour sessions | HSCT, COWFT, SNS, Visual, sentence, digit and dual span, n-back task, MRI | OT                                    |

|                           |                                                      |                                           |                                                                                                                                                                                                   |    |                                             |                                                                                           |                                           |
|---------------------------|------------------------------------------------------|-------------------------------------------|---------------------------------------------------------------------------------------------------------------------------------------------------------------------------------------------------|----|---------------------------------------------|-------------------------------------------------------------------------------------------|-------------------------------------------|
| Brown et al. [47], 2006   | Non-specific SMI                                     | Exercise group intervention               | CG: weight loss program<br>IG: weight loss program incorporating psychiatric rehabilitation (goal setting, social support and skills training)                                                    | 12 | One-weekly two-hour sessions                | Digital scale, portable stadiometer, tape measurer, HPLP-II, multiple-pass 24-hour recall | OT, dietician, exercise psychologist      |
| Choi et al. [23], 2006    | Schizophrenia and schizoaffective disorder           | Cognitive group intervention              | CG: standard psychiatric rehabilitation<br>IG: standard psychiatric rehabilitation and Social Cognition Enhancement Training (e.g. explain coherently the social situation depicted in a cartoon) | 24 | Two-weekly ninety-minute sessions           | PA, SBST, ERT                                                                             | OT, psychologist, nurse, social worker    |
| McInnis et al. [33], 2006 | Schizophrenia                                        | Psychoeducational group intervention      | All participants: usual care and cognitive behavioural therapy group program                                                                                                                      | 16 | One-weekly fifty-minute session             | Insight scale, CFSE-II, medication compliance scale                                       | OT, psychologist                          |
| Schene et al. [24], 2006  | Major depression disorder                            | Psychoeducational group intervention      | CG: Out-patient psychiatric treatment<br>IG: Out-patient psychiatric treatment and occupational therapy                                                                                           | 24 | One- to two-weekly two-hour sessions        | BDI, QOS, Study-specific work questionnaire                                               | OT, psychiatrist                          |
| Chan et al. [25], 2007    | Schizophrenia and schizoaffective disorder           | Psychoeducational individual intervention | CG: Traditional ward occupational therapy program.<br>IG: Transforming Relapse and Instilling Prosperity program.                                                                                 | 52 | Two-weekly fifty-minute sessions            | SUMD, MOS SF-36                                                                           | OT                                        |
| Dunn et al. [36], 2008    | Schizophrenia, major depression and bipolar disorder | Psychoeducational group intervention      | CG: Standard mental health treatment<br>IG: Recovery education program                                                                                                                            | 48 | Two- to three-weekly ninety-minute sessions | SCL-90, SF-36, Basis-32, Tennessee self-concept, PVRQ, RAQ                                | OT, physician, psychologist social worker |

|                           |                                            |                                           |                                                                                                                                                   |    |                                        |                                                       |                                               |
|---------------------------|--------------------------------------------|-------------------------------------------|---------------------------------------------------------------------------------------------------------------------------------------------------|----|----------------------------------------|-------------------------------------------------------|-----------------------------------------------|
| Tetlie et al. [37], 2008  | Non-specific SMI                           | Exercise group intervention               | All participants: two indoor and one outdoor weekly session including aquatics and swimming, conditioning activities, gymnastics, yoga and dance. | 12 | Three-weekly one-hour sessions         | Visual analogue scales, Borg's Scale                  | OT, physician                                 |
| Rouleau et al. [50], 2009 | Schizophrenia and schizoaffective disorder | Psychosocial group intervention           | CG: Pharmacological treatment.<br>IG: Pharmacological treatment and pre-vocational rehabilitation program.                                        | 30 | Six hours of session per week          | PANSS, CPT, TMT A-B, WAIS, RAVLT, NCCEA, WCST         | OT, nurse, psychologist                       |
| Castle et al. [26], 2010  | Bipolar disorder                           | Psychosocial group intervention           | CG: treatment as usual<br>IG: treatment as usual and a knowledge and skills to everyday life situations program (collaborative therapy journal)   | 12 | One-weekly ninety-minute sessions      | MADRS, YMRS                                           | OT, psychologist, psychiatrist, social worker |
| Edgelow et al. [51], 2011 | Schizophrenia and schizoaffective disorder | Psychoeducational individual intervention | CG: Standard care, Assertive Community Treatment (ACT).<br>IG: ACT and AOI (Action Over Inertia) Occupation-based intervention.                   | 12 | One-weekly sessions                    | 24-hour daily time use recall, POES                   | OT                                            |
| Jahn et al. [27], 2011    | Schizophrenia                              | Psychoeducational group intervention      | CG: routine occupational therapy and psychoeducation<br>IG: CG intervention and computerized cognitive training (CCT)                             | 36 | Two-to four-weekly one-hour sessions   | CGI-SCH, CDSS-G PANSS, WFB, GAF TMT A-B, WMS-R, MWCST | OT, psychologist                              |
| Berking et al. [28], 2012 | Major depression disorder                  | Cognitive group intervention              | GC: Routine cognitive behavioural therapy (CBT)<br>IG: Cognitive behavioural therapy and emotion regulation skills training (CBT-ERT)             | 8  | Five-weekly forty-five-minute sessions | BDI, HEALTH-49, PANSS, ERSQ                           | OT, physician, psychologist                   |

|                              |                                            |                                      |                                                                                                                                                                                                                                         |    |                                              |                                               |                          |
|------------------------------|--------------------------------------------|--------------------------------------|-----------------------------------------------------------------------------------------------------------------------------------------------------------------------------------------------------------------------------------------|----|----------------------------------------------|-----------------------------------------------|--------------------------|
| Foruzandeh et al. [52], 2012 | Schizophrenia                              | Psychosocial individual intervention | CG: Routine nursing care such as therapeutic communication and medication such as risperidone and biperiden.<br>IG: Routine medication such as risperidone and biperiden and expressive, artistic, and recreational activities from OT. | 26 | Six-weekly three-hour sessions               | SANS, SAPS                                    | OT                       |
| Tanaka et al. [53], 2014     | Schizophrenia or schizoaffective disorder  | OT group intervention                | CG: Group conventional OT<br>IG: individual early OT intervention and conventional OT                                                                                                                                                   | 12 | Two- to five-weekly thirty-minute sessions   | FIM, BPRS                                     | OT                       |
| Ming-De et al. [38], 2016    | Schizophrenia                              | Cognitive group intervention         | CG: Coloring and handwriting activities.<br>IG: Aerobic group dance program.                                                                                                                                                            | 13 | Three-weekly fifty- to sixty-minute sessions | SDMT, RAVLT, TMT A-B, VF, MMSE                | OT                       |
| Vizzotto et al. [54], 2016   | Schizophrenia                              | Psychosocial group intervention      | CG: Craft activities.<br>IG: Occupational Goal Intervention (OGI method).                                                                                                                                                               | 15 | Two-weekly ninety-minute sessions            | PANSS, BADS, DAFS-BR, ILSS-BR, WAIS           | OT, psychologists        |
| Buschert et al. [29], 2017   | Major depression disorder                  | Exercise group intervention          | CG: Occupational therapy active treatment<br>IG: Physical exercise program                                                                                                                                                              | 4  | Two- to three-weekly thirty-minute sessions  | BDI, HAMD-7, WMS-R, physical fitness measures | OT, sports therapist     |
| Eklund et al. [30], 2017     | A broad spectrum of disorders <sup>c</sup> | Psychosocial group intervention      | CG: Standard psychiatric treatment, active support, mainly standard occupational therapy (daily living skills, social skills or creative activities).                                                                                   | 16 | One-weekly sessions                          | POES, SDO-OB, Oval-pd, MANSA,                 | OT, nurse, social worker |

|                                      |                                            |                                      |                                                                                                                                                                                                                                                                                                                                                                                                                                                        |    |                                                 |                                                                                             |                       |
|--------------------------------------|--------------------------------------------|--------------------------------------|--------------------------------------------------------------------------------------------------------------------------------------------------------------------------------------------------------------------------------------------------------------------------------------------------------------------------------------------------------------------------------------------------------------------------------------------------------|----|-------------------------------------------------|---------------------------------------------------------------------------------------------|-----------------------|
|                                      |                                            |                                      | IG: Standard psychiatric treatment and a group activity-based lifestyle intervention (Balancing Everyday Life program).<br>CG: Standard occupational therapy treatment<br>IG: Metacognitive training program                                                                                                                                                                                                                                           | 8  | (duration not stated)                           | MOS SF-36, GAF, RSE                                                                         |                       |
| Pos et al. [31], 2017                | Schizophrenia and schizoaffective disorder | Cognitive group intervention         |                                                                                                                                                                                                                                                                                                                                                                                                                                                        |    | One-weekly session (duration not stated)        | PANSS, ESM, GPTS, BCIS                                                                      | OT, psychiatric nurse |
| Kaizerman-Dinerman et al. [48], 2018 | Schizophrenia                              | Cognitive group intervention         | CG: Usual psychiatric rehabilitation services.<br>IG: Usual psychiatric rehabilitation services and metacognitive group intervention based on processing strategies and self-monitoring skills                                                                                                                                                                                                                                                         | 4  | One-weekly two-hour sessions                    | BRIEF-A, WCPA, ACS, COPM, PANSS                                                             | OT                    |
| Shimada et al. [32], 2018            | Schizophrenia and schizoaffective disorder | Psychosocial individual intervention | CG: An activity-oriented group treatment (GOT). program. It consists of physical fitness program, handicraft activities, cooking program; a group music program, a recreation program; and a group psychoeducation program.<br>IG: Individualized occupational therapy (IOT) program. It consists of motivational interviewing, self-monitoring, individualized visits, handicraft activities, individualized psychoeducation, and discharge planning. | 13 | Three- to five-weekly one- to two-hour sessions | BACS-J, SCoRS-J, SFS-J, GAF, IMI-J, MMAS-8, PANSS, CSQ-8J.                                  | OT, hospital staff    |
| Singh et al. [39], 2018              | Schizophrenia                              | Psychoeducational group intervention | All participants: "Therapeutic package" (psychoeducation, therapeutic alliance, social skills and life balance)                                                                                                                                                                                                                                                                                                                                        | 12 | One- to two-weekly ninety-minute session        | Self-prepared Motivational Analysis Checklist, SOFS, Self-prepared Social skills Checklist. | TO                    |

|                              |                                                              |                                      |                                                                                                                                                                                                                                                                                        |    |                                                     |                             |                                     |
|------------------------------|--------------------------------------------------------------|--------------------------------------|----------------------------------------------------------------------------------------------------------------------------------------------------------------------------------------------------------------------------------------------------------------------------------------|----|-----------------------------------------------------|-----------------------------|-------------------------------------|
| Kim et al. [40], 2019        | Schizophrenia                                                | Psychosocial group intervention      | CG: Conventional rehabilitation programs consisted of physical exercise, social skill training, and social-adaptation training.<br>IG: Conventional rehabilitation and Grocery Shopping Improvement (GSSE) program.                                                                    | 4  | Two-weekly fifty-minute sessions                    | EFPT-K, K-IADL, MoCA-K, GAF | OT                                  |
| Argentzell et al. [41], 2020 | A broad spectrum of disorders <sup>c</sup>                   | Psychosocial group intervention      | CG: Standard occupational therapy<br>IG: Balancing Everyday Life program (BEL)                                                                                                                                                                                                         | 16 | One-weekly session (duration not stated)            | POES, SDO-OB, QPR, GAF      | OT                                  |
| Gökçen et al. [33], 2020     | Schizophrenia                                                | Exercise group intervention          | CG: Traditional outpatient care<br>IG: Traditional outpatient care and Dance/movement therapy (DMT). The sessions included five phases: greeting/warm-up, mirroring, theme building, cool down and closing. Turkish folk/traditional instrumental music was preferred in the sessions. | 8  | Two-weekly forty- to fifty-minute sessions          | PANSS, FROGS                | OT, physiotherapists, psychiatrist. |
| Mashimo et al. [34], 2020    | Schizophrenia, schizoaffective disorder and major depression | Psychosocial individual intervention | CG: Home-visit OT (craft work, exercise therapy, medication management, money management)<br>IG: Management Tool for Daily Life Performance (MTDLP). This is a three-step program to achieve the collaborative goal for participants' desired daily life activity.                     | 16 | One- to two-weekly thirty- to sixty-minute sessions | GAF, SFS                    | OT                                  |
| Ramano et al. [42], 2020     | Major depressive disorder                                    | Psychosocial group intervention      | CG: A combination of activity-based groups (creativity and leisure activity groups) and discussion-based groups (stress management, social skills and interpersonal support).<br>IG: CG activity program and a new activity-based occupational therapy intervention group program.     | 2  | One-daily ninety-minute sessions                    | SIS, BaPFE-R, TOA           | OT                                  |

|                             |                                            |                                      |                                                                                                                                                                                                                                                                 |    |                                          |                       |                                           |
|-----------------------------|--------------------------------------------|--------------------------------------|-----------------------------------------------------------------------------------------------------------------------------------------------------------------------------------------------------------------------------------------------------------------|----|------------------------------------------|-----------------------|-------------------------------------------|
| Shinozaki et al. [43], 2020 | Schizophrenia                              | Psychoeducational group intervention | All participants: Psychoeducation for Schizophrenia Program (4 session course: schizophrenia, drugs, stress, social resources)                                                                                                                                  | 4  | One-weekly session (duration not stated) | SWNS-J, DAI-10, PANSS | OT, pharmacist, psychiatric social worker |
| Yilmaz et al. [49], 2020    | Schizophrenia and bipolar disorder         | Psychosocial individual intervention | CG: outpatient clinic follow-up.<br>IG1: routine case management and occupational therapy at the Community Mental Health Center (CMHC)<br>IG2: Psychosocial Skill Training (PSST) in addition to CMHC service.                                                  | 18 | One- to two-weekly one-hour sessions     | PANSS, PSP, SFS       | OT                                        |
| Wasmuth et al. [44], 2021   | A broad spectrum of disorders <sup>d</sup> | Psychoeducational group intervention | CG: Treatment as usual (TAU) without OT (medication management, group and individual psychotherapies, case management and skills interventions to assist with housing)<br>IG: TAU and OT narrative medicine (performance of a personally meaningful occupation) | 12 | One-weekly one-hour session              | OCAIRS, RAS           | OT                                        |

ACS: Activity Card Sort; BACS-J: Brief Assessment of Cognition in Schizophrenia Japanese version; BADS: Behavioral Assessment of the Dysexecutive Syndrome; BaPFE-R: Bay Area Functional Performance Evaluation-Revised; BPRS: Brief Psychiatric Rating Scale; BRIEF-A: Behavior Rating Inventory of Executive Function; CG int: Control Group intervention; CGI-SCH: Clinical Global Impression Scale – Schizophrenia Version; CFSE-II: Culture free self-esteem inventory; CDSS-G: Calgary Depression Rating Scale for Schizophrenia; COPM: Canadian Occupational Performance Measure; COTE: Chinese Comprehensive Occupational Therapy Evaluation Scale; COWFT: Controlled Oral Word Fluency Test; CSQ-8J: Client Satisfaction Questionnaire-8 Japanese version; CPT: Continuous Performance Test; DAFS-BR: Direct Assessment of Functional Status-Revised Portuguese version; DAI-10: Drug Attitude Inventory-10; EFPT-K: Executive Function Performance Test Korean version; ERT: Emotion Recognition Test; FROGS: Functional Remission of General Schizophrenia; GAF: Global Assessment of Functioning scale; GAS: Global Assessment Scale; GATB: General Aptitude Test Battery; GCOS: Chinese General Causality Orientations Scale; GHQ: General Health Questionnaire; HPLP-II: Health-Promoting Lifestyle Profile II; HSCT: Hayling Sentence Completion Task; IADL: Instrumental activities of daily living questionnaire; IG int: Intervention Group intervention; ILSS-BR: Independent Living Skills Survey Portuguese version; IMI-J: Intrinsic Motivation Inventory Japanese version; K-IADL: Korean Instrumental Activities of Daily Living; LPAD: Learning Potential Assessment Device; MADRS: Montgomery–Asberg Depression Rating Scale; MANSA: Manchester Short Assessment of Quality of Life; MMAS-8: Morisky Medication Adherence Scale; MMSE: Mini-Mental State Examination; MSE: Mental Status Exam; MoCA-K: Montreal Cognitive Assessment Korean version; MOS SF-36: Medical Outcomes Study Short Form-36; MWCST: Modified Wisconsin Card Sorting Test; NCCEA: Neurosensory Center Comprehensive Examination for Aphasia; OCAIRS: Occupational

---

Circumstances Assessment Interview and Rating Scale; OT: Occupational Therapist; Oval-pd: Occupational Value with predefined items Swedish version; PA: Picture Arrangement; PANSS: Positive and Negative Syndrome Scale; POES: Profiles of Occupational Engagement among people with Severe mental illness; RAVLT: Rey Auditory Verbal Learning Test; RAS: Recovery Assessment Scale; RCF: Rey's Complex Figure; RPM: Raven Progressive Matrices; RSE: Rosenberg self-esteem scale; SANS: Andreasen's scale for assessment of negative symptoms; SAPS: Andreasen's scale for assessment of positive symptoms; SBS: Social Behaviour Scale; SBST: Social Behavior Sequencing Task; SCoRS-J: Schizophrenia Cognition Rating Scale Japanese version; SDMT: Symbol Digit Modalities Test Chinese version; SDO-OB: Satisfaction with daily occupations and occupational balance; SFS: Social Functioning Scale; SFS-J: Social Functioning Scale Japanese version; SIS: Social Interaction Scale; SNS: Stroop Neuropsychological Screening Test; SOFS: Social-occupational functioning scale; SUMD: Scale of Unawareness of Mental Disorder; SWNS-J :Subjective Well-Being Under Neuroleptic Drug Treatment Scale Short Form; TCSC-2: Fitts Self-Concept Scale, TMT A-B: Trail Making Test, Parts A and B; TOA: Task Oriented Assessment; VF: Verbal Fluency Test; w: weeks; WAIS: Wechsler Adult Intelligence Scale; WCPA: Weekly Calendar Planning Activity; WCST: Wisconsin Card Sorting Test; WFB: Knowledge of Illness Questionnaire; WMS-R: Wechsler Memory Scale – Revised; YMRS: Young Mania Rating Scale. <sup>a</sup>Type of SMI intervened. <sup>b</sup>Session duration is reported where available. <sup>c</sup>Anxiety, bipolar disorder, depressive disorder, psychosis, attention deficit hyperactivity disorder. <sup>d</sup>Schizoaffective disorder, schizophrenia, bipolar II disorder, borderline personality disorder, major depressive disorder, traumatic brain injury, generalized anxiety disorder, cannabis use disorder, unspecified psychosis, narcissistic personality disorder, delusional disorder, attention deficit hyperactive disorder.
